# Supplementary material for: Contrast extravasation and outcome of endovascular therapy in acute ischaemic stroke: a systematic review and meta-analysis
Source: HighWire-hosted journal article supplement (doi:10.1136/bmjopen-2020-044917), 2021-07-01
Supplement: bmjopen-2020-044917supp001_data_supplement.pdf [file bmjopen-2020-044917supp001_data_supplement.pdf]

## Online Supplementary Materials

### **Title: contrast extravasation and outcome of endovascular therapy in acute ischemic stroke: a systematic review and meta-analysis**

Tao Xu, You Wang, JinxianYuan, Yangmei Chen, Haiyan Luo\*

Department of Neurology, the Second Affiliated Hospital of Chongqing Medical University, Chongqing, China.

**\*Correspondence to:** Haiyan Luo, e-mail: haiyanl@hospital.cqmu.edu.cn, Department of Neurology, the Second Affiliated Hospital of Chongqing Medical University, Yuzhong District, Chongqing, 400010, China. Tel: +8623 63693088. Fax: +8623 63693086.

**Table S1.** Search strategy in the Medline database.

| Steps*                         | Queries                                                                                                                                                                                                                                                                                                                                                                                                                                                                                                                                                                                  | Number of studies |
|--------------------------------|------------------------------------------------------------------------------------------------------------------------------------------------------------------------------------------------------------------------------------------------------------------------------------------------------------------------------------------------------------------------------------------------------------------------------------------------------------------------------------------------------------------------------------------------------------------------------------------|-------------------|
| #1                             | Search: ((((((Thrombectomy) OR (Endovascular)) OR (reperfusion)) OR (Recanalization)) OR (Aspiration)) OR (retriever)) OR (intra-arterial)) OR (revascularization)                                                                                                                                                                                                                                                                                                                                                                                                                       | 368,970           |
| #2                             | Search: (((((Blood Brain Barrier[Title/Abstract]) OR (Contrast Staining[Title/Abstract])) OR (Barrier[Title/Abstract])) OR (Contrast[Title/Abstract])) OR (Hyperdensity[Title/Abstract])) OR (high-density[Title/Abstract])                                                                                                                                                                                                                                                                                                                                                              | 1,250,079         |
| #3                             | Search: (patients[Title/Abstract]) OR (patient[Title/Abstract])                                                                                                                                                                                                                                                                                                                                                                                                                                                                                                                          | 6,646,483         |
| #4                             | Search: ((((((Occlusion) OR (Occlusions)) OR (Cerebral Infarction)) OR (Infarction)) OR (stroke)) OR (ischemic)) OR (ischaemia)                                                                                                                                                                                                                                                                                                                                                                                                                                                          | 1,007,464         |
| #1 and #2 and #3 and #4 and #5 | Search: (((((((Occlusion) OR (Occlusions)) OR (Cerebral Infarction)) OR (Infarction)) OR (stroke)) OR (ischemic)) OR (ischaemia)) AND ((patients[Title/Abstract]) OR (patient[Title/Abstract])) AND (((((Blood Brain Barrier[Title/Abstract]) OR (Contrast Staining[Title/Abstract])) OR (Barrier[Title/Abstract])) OR (Contrast[Title/Abstract])) OR (Hyperdensity[Title/Abstract])) OR (high-density[Title/Abstract])) AND ((((((Thrombectomy) OR (Endovascular)) OR (reperfusion)) OR (Recanalization)) OR (Aspiration)) OR (retriever)) OR (intra-arterial)) OR (revascularization)) | 5,098             |

\*The search strategy for the Embase and the Cochrane Library database was similar to that used for the Medline database. We also examined the reference lists of the included articles to obtain additional relevant studies. There was no limitation on literature language or publication type or time.

**Table S2.** The raw data to calculate ORs for the association between CE and the outcomes of EVT.

| First Author, y of publication            | CE   |          | non-CE      |          |
|-------------------------------------------|------|----------|-------------|----------|
|                                           | case | non-case | case        | non-case |
| <b>90 day poor functional outcomes</b>    |      |          |             |          |
| Chen 2020                                 |      |          | Adjusted OR |          |
| Sun 2019                                  |      |          | Adjusted OR |          |
| Chen 2019                                 | 27   | 15       | 12          | 28       |
| An 2019                                   | 29   | 21       | 34          | 96       |
| Renu 2015                                 |      |          | Adjusted    |          |
| Rouchaud 2014                             | 11   | 14       | 24          | 14       |
| Nikoubashman 2014                         | 18   | 6        | 52          | 20       |
| Desilles 2013                             |      |          | Adjusted OR |          |
| Kim 2012                                  | 19   | 19       | 19          | 11       |
| Yoon 2004                                 | 14   | 7        | 16          | 25       |
| <b>Discharge poor functional outcomes</b> |      |          |             |          |
| Chen 2020                                 | 45   | 6        | 84          | 31       |
| Shi 2018                                  |      |          | Adjusted OR |          |
| Kim 2015                                  | 14   | 19       | 4           | 19       |
| Nikoubashman 2014                         | 23   | 4        | 67          | 16       |
| <b>90 day mortality</b>                   |      |          |             |          |
| Chen 2020                                 | 5    | 46       | 11          | 104      |
| An 2019                                   | 17   | 33       | 32          | 98       |
| Rouchaud 2014                             | 5    | 20       | 13          | 25       |
| Desilles 2013                             |      |          | Adjusted OR |          |
| Kim 2012                                  | 3    | 35       | 1           | 29       |
| <b>Discharge mortality</b>                |      |          |             |          |
| Chen 2020                                 | 5    | 46       | 6           | 109      |
| Shi 2018                                  | 20   | 134      | 12          | 44       |

**ICH**

|                   |    |    |             |    |
|-------------------|----|----|-------------|----|
| Kim 2020          | 84 | 18 | 8           | 35 |
| Chen 2020         | 25 | 26 | 37          | 78 |
| Xu 2019           | 58 | 1  | 54          | 85 |
| Chen 2019         | 26 | 16 | 15          | 25 |
| An 2019           |    |    | Adjusted OR |    |
| Shi 2018          |    |    | Adjusted OR |    |
| Renu 2015         |    |    | Adjusted OR |    |
| Kim 2015          | 21 | 12 | 8           | 15 |
| Rouchaud 2014     | 32 | 6  | 2           | 25 |
| Nikoubashman 2014 | 7  | 16 | 6           | 70 |
| Desilles 2013     |    |    | Adjusted OR |    |
| Jang 2006         | 18 | 13 | 15          | 48 |
| Yoon 2004         | 9  | 12 | 18          | 23 |

**sICH**

|                   |    |    |             |     |
|-------------------|----|----|-------------|-----|
| Kim 2020          | 23 | 79 | 1           | 42  |
| Chen 2020         | 5  | 46 | 8           | 107 |
| Chen 2019         | 2  | 40 | 0           | 40  |
| An 2019           | 9  | 41 | 10          | 120 |
| Kim 2015          | 13 | 20 | 1           | 22  |
| Nikoubashman 2014 | 2  | 25 | 1           | 85  |
| Desilles 2013     |    |    | Adjusted OR |     |
| Kim 2012          | 5  | 33 | 1           | 29  |
| Yoon 2004         | 7  | 14 | 6           | 35  |

---

**Abbreviations:** CE = contrast extravasation; EVT = endovascular therapy; OR = odds ratio; ICH = intracranial hemorrhage; sICH = symptomatic intracranial hemorrhage.

**Table S3.** Quality assessment of the included studies\*

| Reference#                      | Is the exposed cohort representative | Selection of the non-exposed cohort | Ascertainment of exposure | Demonstration that outcome of interest was not present at start of study | Comparability of important factors† | Assessment of outcome | Follow up period | Adequacy of follow up of cohorts | Total quality scores |
|---------------------------------|--------------------------------------|-------------------------------------|---------------------------|--------------------------------------------------------------------------|-------------------------------------|-----------------------|------------------|----------------------------------|----------------------|
| Kim 2020 <sup>1</sup>           | ☆                                    | ☆                                   | ☆                         | ☆                                                                        | ☆☆                                  | ☆                     | —                | —                                | 7                    |
| Chen 2020 <sup>2</sup>          | ☆                                    | ☆                                   | ☆                         | ☆                                                                        | ☆☆                                  | ☆                     | —                | —                                | 7                    |
| Xu 2019 <sup>3</sup>            | ☆                                    | ☆                                   | ☆                         | ☆                                                                        | ☆                                   | ☆                     | ☆                | ☆                                | 8                    |
| Sun 2019 <sup>4</sup>           | ☆                                    | ☆                                   | ☆                         | ☆                                                                        | ☆☆                                  | ☆                     | —                | —                                | 7                    |
| Chen 2019 <sup>5</sup>          | ☆                                    | ☆                                   | ☆                         | ☆                                                                        | ☆                                   | ☆                     | —                | —                                | 6                    |
| An 2019 <sup>6</sup>            | ☆                                    | ☆                                   | ☆                         | ☆                                                                        | —                                   | ☆                     | ☆                | ☆                                | 7                    |
| Shi 2018 <sup>7</sup>           | ☆                                    | ☆                                   | ☆                         | ☆                                                                        | ☆                                   | ☆                     | —                | —                                | 6                    |
| Renú 2015 <sup>8</sup>          | ☆                                    | ☆                                   | ☆                         | ☆                                                                        | ☆☆                                  | ☆                     | ☆                | ☆                                | 9                    |
| Kim 2015 <sup>9</sup>           | ☆                                    | ☆                                   | ☆                         | ☆                                                                        | ☆                                   | ☆                     | —                | —                                | 6                    |
| Rouchaud 2014 <sup>10</sup>     | ☆                                    | ☆                                   | ☆                         | ☆                                                                        | ☆                                   | ☆                     | —                | —                                | 6                    |
| Nikoubashman 2014 <sup>11</sup> | ☆                                    | ☆                                   | ☆                         | ☆                                                                        | ☆                                   | ☆                     | —                | —                                | 6                    |
| Desilles 2013 <sup>12</sup>     | ☆                                    | ☆                                   | ☆                         | ☆                                                                        | ☆☆                                  | ☆                     | ☆                | ☆                                | 9                    |
| Kim 2012 <sup>13</sup>          | ☆                                    | ☆                                   | ☆                         | ☆                                                                        | ☆                                   | ☆                     | —                | —                                | 6                    |
| Jang 2006 <sup>14</sup>         | ☆                                    | ☆                                   | ☆                         | ☆                                                                        | ☆                                   | ☆                     | —                | —                                | 6                    |
| Yoon 2004 <sup>15</sup>         | ☆                                    | ☆                                   | ☆                         | ☆                                                                        | ☆                                   | ☆                     | —                | —                                | 6                    |

\*Newcastle-Ottawa Scale was used to assess the study quality in this meta-analysis.<sup>16</sup> The full score was 9 stars, and the high-quality study was defined as a study with 8 awarded stars.

†A maximum of two stars could be awarded for this item. One star with adjustment for age, two stars if there were additional population demographics or comorbidities.

**Table S4.** Sensitivity analyses for the pooled analysis of poor functional outcome at 90 days restricted to predefined variables.

| Variable                                               | No. of Studies | OR   | 95% CI     | p value | I <sup>2</sup> | PI    |
|--------------------------------------------------------|----------------|------|------------|---------|----------------|-------|
| <b>Study design</b>                                    |                |      |            |         |                | 0.317 |
| Retrospective                                          | 7              | 1.67 | 1.13-2.47  | 0.011   | 69.0           |       |
| Prospective                                            | 3              | 2.77 | 1.76-4.35  | < 0.001 | 82.6           |       |
| <b>Sample size</b>                                     |                |      |            |         |                | 0.262 |
| ≥100                                                   | 6              | 2.88 | 1.48-5.60  | 0.002   | 65.9           |       |
| <100                                                   | 4              | 1.37 | 0.44-4.23  | 0.587   | 80.2           |       |
| <b>Assessment strategy of CE</b>                       |                |      |            |         |                | 0.039 |
| Dual-energy CT                                         | 4              | 4.45 | 2.51-7.87  | < 0.001 | 22.8           |       |
| NECT and a follow-up NECT or MRI at 24 hours after EVT | 6              | 1.31 | 0.67-2.57  | 0.429   | 67.2           |       |
| <b>Study quality</b>                                   |                |      |            |         |                | 0.510 |
| <8                                                     | 8              | 1.94 | 1.02-3.69  | 0.044   | 70.6           |       |
| ≥8                                                     | 2              | 3.74 | 0.40-35.46 | 0.250   | 89.7           |       |
| <b>Adjusted for confounders</b>                        |                |      |            |         |                | 0.282 |
| No                                                     | 6              | 1.62 | 0.73-3.63  | 0.238   | 77.0           |       |
| Yes                                                    | 4              | 3.43 | 1.27-9.25  | 0.015   | 72.7           |       |

**Abbreviations:** CE = contrast extravasation; EVT = endovascular therapy; NECT = non-enhanced computed tomography; MRI = magnetic resonance imaging; OR = odds ratio.

**Table S5.** Sensitivity analyses for the pooled analysis of post-EVT ICH restricted to predefined variables.

| Variable                                               | No. of Studies | OR    | 95% CI     | p-values | I <sup>2</sup> | PI    |
|--------------------------------------------------------|----------------|-------|------------|----------|----------------|-------|
| <b>Study design</b>                                    |                |       |            |          |                | 0.511 |
| Retrospective                                          | 9              | 5.80  | 2.58-13.03 | < 0.001  | 83.4           |       |
| Prospective                                            | 4              | 9.29  | 3.40-25.35 | < 0.001  | 55.1           |       |
| <b>Sample size</b>                                     |                |       |            |          |                | 0.305 |
| ≥100                                                   | 8              | 9.03  | 4.00-20.38 | < 0.001  | 78.4           |       |
| <100                                                   | 5              | 4.15  | 1.48-11.66 | 0.007    | 77.8           |       |
| <b>Assessment strategy of CE</b>                       |                |       |            |          |                | 0.400 |
| Dual-energy CT                                         | 3              | 3.24  | 1.50-6.99  | 0.003    | 33.6           |       |
| NECT and a follow-up NECT or MRI at 24 hours after EVT | 10             | 8.02  | 3.69-17.43 | < 0.001  | 80.6           |       |
| <b>Study quality</b>                                   |                |       |            |          |                | 0.494 |
| <8                                                     | 10             | 5.90  | 2.78-12.51 | < 0.001  | 81.4           |       |
| ≥8                                                     | 3              | 10.84 | 2.67-44.05 | 0.001    | 70.0           |       |
| <b>Adjusted for confounders</b>                        |                |       |            |          |                | 0.641 |
| No                                                     | 9              | 6.01  | 2.63-13.73 | < 0.001  | 81.8           |       |
| Yes                                                    | 4              | 9.10  | 4.04-20.50 | < 0.001  | 53.0           |       |

**Abbreviations:** CE = contrast extravasation; NECT = non-enhanced computed tomography; MRI = magnetic resonance imaging; OR = odds ratio; PI, P interaction.

**Table S6.** Egger's tests for publication bias.

| Variables                                                     | Egger's tests |            |
|---------------------------------------------------------------|---------------|------------|
|                                                               | p-values      | 95% CIs    |
| Association between CE and poor functional outcome at 90 days | 0.68          | -5.36-7.85 |
| Association between CE and mortality at 90 days               | 0.65          | -6.37-4.65 |
| Association between CE and post-EVT ICH                       | 0.10          | -0.83-8.36 |
| Association between CE and post-EVT sICH                      | 0.05          | -0.04-2.96 |

**Abbreviations:** CE = contrast extravasation; EVT = endovascular therapy; ICH = intracranial hemorrhage; sICH = symptomatic intracranial hemorrhage; PI, P interaction.

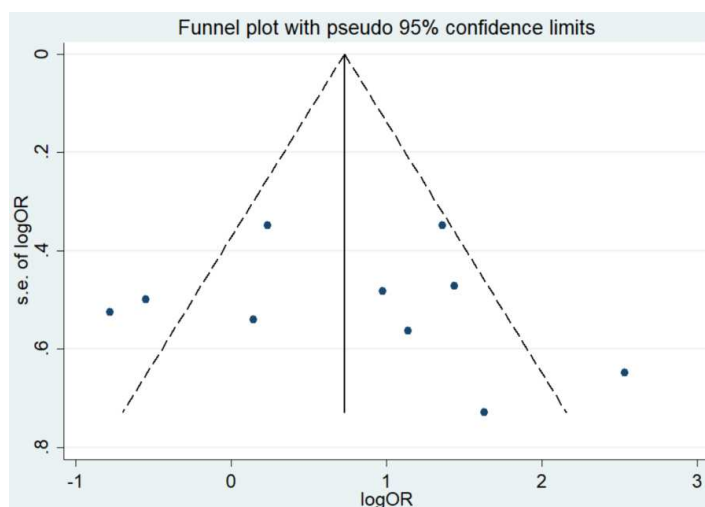

**Figure S1.** Funnel plot for publication bias test for the associations between contrast extravasation and poor functional outcomes at 90 days.

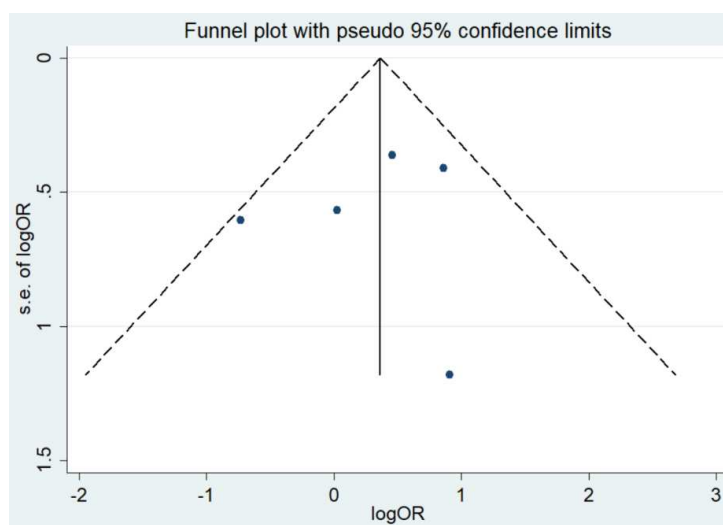

**Figure S2.** Funnel plot for publication bias test for the associations between contrast extravasation and mortality at 90 days.



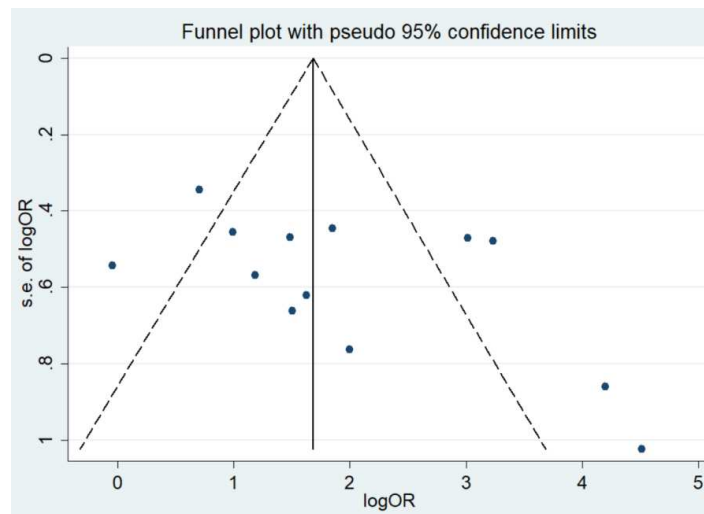

**Figure S3.** Funnel plot for publication bias test for the associations between contrast extravasation and intracranial haemorrhage.

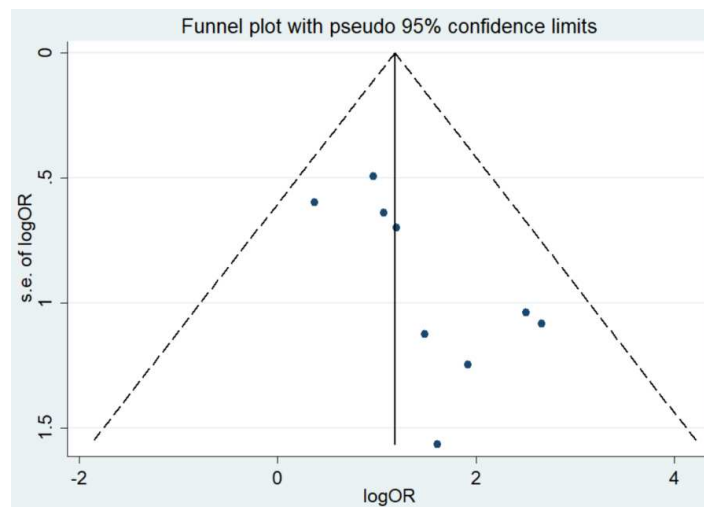

**Figure S4.** Funnel plot for publication bias test for the associations between contrast extravasation and symptomatic intracranial haemorrhage.

## References

1. Kim H, Lee SJ, Lee TK, et al. Subarachnoid Contrast Accumulation and Alberta Stroke Program Early Computed Tomography Score Applied to Contrast Accumulation After Thrombectomy as Predictors of Symptomatic Hemorrhage. *World Neurosurg* 2020.
2. Chen Z, Zhang Y, Su Y, et al. Contrast Extravasation is Predictive of Poor Clinical Outcomes in Patients Undergoing Endovascular Therapy for Acute Ischemic Stroke in the Anterior Circulation. *J Stroke Cerebrovasc Dis* 2020;**29**:104494.
3. Xu C, Zhou Y, Zhang R, et al. Metallic Hyperdensity Sign on Noncontrast CT Immediately after Mechanical Thrombectomy Predicts Parenchymal Hemorrhage in Patients with Acute Large-Artery Occlusion. *AJNR Am J Neuroradiol* 2019;**40**:661-67.
4. Sun Y, Su Y, Chen Z, et al. Contrast Extravasation After Endovascular Treatment in Posterior Circulation Stroke. *World Neurosurg* 2019;**130**:e583-e87.
5. Chen WH, Yi TY, Wu YM, et al. Parenchymal hyperdensity on C-arm CT images after endovascular therapy for acute ischaemic stroke predicts a poor prognosis. *Clin Radiol* 2019;**74**:399-404.
6. An H, Zhao W, Wang J, et al. Contrast Staining may be Associated with Intracerebral Hemorrhage but Not Functional Outcome in Acute Ischemic Stroke Patients Treated with Endovascular Thrombectomy. *Aging Dis* 2019;**10**:784-92.
7. Shi ZS, Duckwiler GR, Jahan R, et al. Early Blood-Brain Barrier Disruption after Mechanical Thrombectomy in Acute Ischemic Stroke. *J Neuroimaging* 2018;**28**:283-88.
8. Renú A, Amaro S, Laredo C, et al. Relevance of blood-brain barrier disruption after endovascular treatment of ischemic stroke: dual-energy computed tomographic study. *Stroke* 2015;**46**:673-9.
9. Kim JM, Park KY, Lee WJ, et al. The cortical contrast accumulation from brain computed tomography after endovascular treatment predicts symptomatic hemorrhage. *Eur J Neurol* 2015;**22**:1453-8.
10. Rouchaud A, Pistocchi S, Blanc R, et al. Predictive value of flat-panel CT for haemorrhagic transformations in patients with acute stroke treated with thrombectomy. *J Neurointerv Surg* 2014;**6**:139-43.
11. Nikoubashman O, Reich A, Pjontek R, et al. Postinterventional subarachnoid haemorrhage after endovascular stroke treatment with stent retrievers. *Neuroradiology* 2014;**56**:1087-96.
12. Desilles JP, Rouchaud A, Labreuche J, et al. Blood-brain barrier disruption is associated with increased mortality after endovascular therapy. *Neurology* 2013;**80**:844-51.
13. Kim JT, Heo SH, Cho BH, et al. Hyperdensity on non-contrast CT immediately after intra-arterial revascularization. *J Neurol* 2012;**259**:936-43.
14. Jang YM, Lee DH, Kim HS, et al. The fate of high-density lesions on the non-contrast CT obtained immediately after intra-arterial thrombolysis in ischemic stroke patients. *Korean J Radiol* 2006;**7**:221-8.
15. Yoon W, Seo JJ, Kim JK, et al. Contrast enhancement and contrast extravasation on computed tomography after intra-arterial thrombolysis in patients with acute ischemic stroke. *Stroke* 2004;**35**:876-81.
16. Stang A. Critical evaluation of the Newcastle-Ottawa scale for the assessment of the quality of nonrandomized studies in meta-analyses. *Eur J Epidemiol* 2010;**25**:603-5.
